# Supplementary material for: A Novel Protocol to Assess Acclimation Rate in Bos taurus Heifers during Yard Weaning
Source: Animals (Basel). 2018 Apr 3;8(4):51. doi: 10.3390/ani8040051 (PMC5946135; doi:10.3390/ani8040051)
Supplement: Supplementary file 1 [file animals-08-00051-s001.csv]

tag	birth weight	age	mob	brand	day 0 weight	day 9 weight	1 mth post weight	5 mth post weight	10 mth post weight	day 0 FT	day 3 FT	day 6 FT	day 9 FT	1 mth post FT	time day 1	time day 2	time day 3	time day 4	time day 5	time day 6	order day 1	order day 2	order day 3	order day 4	order day 5	order day 6	movement group	time day 9	test order day 9	d0 haptoglobin raw (mg/ml)	d0 haptoglobin corrected (mg/ml)	d3 haptoglobin raw (mg/ml)	d3 haptoglobin corrected (mg/ml)
APJL502	33	296	4	38	287	272	308	322	528	0.45	0.52	0.45	0.52	0.42	268	25	53	52	58	64	15	3	24	7	19	31	F	11	7	BLDL	BLDL	BLDL	BLDL
APJL503	32	295	4	4	303	288	317	394	283	0.745	0.65	0.58	0.65	0.615	278	67	30	38	37	33	20	30	9	1	7	10	F	70	4	BLDL	BLDL	BLDL	BLDL
APJL504	35	294	4	5	310	286	325	378	572	0.52	0.71	0.58	0.645	0.55	281	24	55	83	40	21	21	2	25	28	9	3	F	11	41	BLDL	BLDL	BLDL	BLDL
APJL505	31	294	4	36	312	320	340	399	568	0.585	0.58	0.52	0.55	0.45	294	38	57	54	28	43	28	10	27	9	2	17	F	12	20	0.017	-0.081	BLDL	BLDL
APJL506	37	293	4	46	330	310	344	411	618	0.55	0.65	0.45	0.52	0.455	261	40	41	59	87	39	12	12	16	12	35	14	F	12	32	BLDL	BLDL	BLDL	BLDL
APJL508	31	290	4	32	300	286	308	336	510	0.745	0.65	0.65	0.65	0.485	322	96	81	99	49	46	38	50	43	31	14	18	L	44	22	BLDL	BLDL	0.01	-0.089
APJL510	35	288	4	8	262	280	301	316	490	0.615	0.58	0.52	0.645	0.55	313	26	88	127	94	88	37	4	47	45	37	45	L	41	13	0.013	-0.044	0.01	-0.102
APJL513	37.5	262	4	28	303	288	319	377	538	0.55	0.52	0.58	0.68	0.645	276	43	28	68	56	72	19	14	8	20	18	37	F	9	35	BLDL	BLDL	BLDL	BLDL
APJL514	36.2	258	4	41	288	275	301	286	516	0.515	0.45	0.39	0.485	0.42	308	75	69	64	95	92	35	37	36	17	38	47	L	109	43	BLDL	BLDL	0.02	-0.196
APJL515	32	253	4	7	236	248	277	290	485	0.45	0.58	0.52	0.615	0.615	239	37	26	60	42	22	2	9	7	13	10	4	F	11	3	BLDL	BLDL	0.014	-0.09
APJL516	30	246	3	30	276	262	292	348	522	0.39	0.65	0.52	0.68	0.875	259	77	22	50	104	82	11	38	4	6	42	42	M	10	21	BLDL	BLDL	0.022	-0.109
APJL519	34	246	3	31	222	216	233	323	466	0.515	0.65	0.58	0.52	0.58	298	44	23	48	89	41	30	15	5	5	36	16	F	75	33	BLDL	BLDL	BLDL	BLDL
APJL521	33.8	244	3	20	297	280	291	325	502	0.58	0.58	0.58	0.515	0.515	247	72	39	119	81	59	6	34	15	41	31	27	L	21	34	0.018	-0.091	0.021	-0.085
APJL522	33.4	243	1	37	292	273	293	331	464	0.485	0.45	0.45	0.52	0.65	303	61	68	105	85	91	33	27	35	34	34	46	L	10	49	BLDL	BLDL	BLDL	BLDL
APJL524	38	239	2	39	274	267	289	360	489	0.515	0.78	0.58	0.615	0.55	300	55	45	82	111	87	31	22	19	27	45	44	L	47	29	BLDL	BLDL	BLDL	BLDL
APJL525	39	239	2	10	281	278	299	351	524	0.585	0.65	0.58	0.645	0.645	346	31	18	63	52	17	42	5	1	16	16	1	F	9	27	BLDL	BLDL	BLDL	BLDL
APJL530	36	238	1	9	296	282	298	329	483	0.485	0.58	0.58	0.55	0.615	274	53	65	55	97	80	18	21	33	10	39	41	L	20	30	0.01	-0.097	BLDL	BLDL
APJL531	38	238	2	6	313	298	319	353	520	0.68	0.78	0.71	0.71	0.515	326	65	48	47	27	19	40	29	21	4	1	2	F	38	12	BLDL	BLDL	BLDL	BLDL
APJL532	40	238	2	11	292	278	293	342	512	0.52	0.58	0.65	0.645	0.585	250	34	42	61	74	65	7	7	17	14	26	32	F	43	25	0.014	-0.056	BLDL	BLDL
APJL533	35.4	237	2	14	278	264	289	311	482	0.615	0.52	0.58	0.58	0.45	264	74	38	79	31	57	13	36	14	25	4	26	M	44	18	BLDL	BLDL	0.43	0.159
APJL535	37	237	1	12	302	282	316	373	542	0.585	0.65	0.65	0.715	0.55	241	48	50	91	107	51	3	17	22	29	43	22	M	11	1	BLDL	BLDL	BLDL	BLDL
APJL537	48	236	1	45	321	305	334	359	530	0.585	0.65	0.65	1.135	0.615	272	50	47	74	79	78	17	19	20	23	30	40	L	13	17	BLDL	BLDL	BLDL	BLDL
APJL538	36	236	3	33	275	261	282	308	506	0.42	0.58	0.39	0.42	0.55	283	73	59	57	63	53	22	35	29	11	21	23	M	27	36	0.012	-0.058	BLDL	BLDL
APJL539	34.3	235	3	23	267	260	281	358	514	0.615	0.78	0.52	0.55	0.65	293	84	33	78	61	71	27	43	11	24	20	36	F	172	8	0.019	-0.084	BLDL	BLDL
APJL542	35	235	3	17	282	274	290	302	478	0.485	0.58	0.45	0.45	0.39	297	78	52	52	71	35	29	39	23	8	25	11	F	62	47	0.292	0.063	BLDL	BLDL
APJL543	37	232	3	50	256	251	261	307	474	0.81	1.17	0.52	0.615	0.55	266	63	78	114	84	27	14	28	41	38	33	6	L	155	44	BLDL	BLDL	0.663	0.167
APJL545	37	232	2	15	323	313	329	402	576	0.42	0.45	0.45	0.52	0.42	324	41	43	121	76	69	39	13	18	43	28	35	F	11	45	BLDL	BLDL	0.281	0.085
APJL548	36	232	2	3	255	242	269	345	510	0.45	0.78	0.84	0.68	0.45	358	22	20	101	101	61	43	1	3	32	40	28	F	19	11	BLDL	BLDL	BLDL	BLDL
APJL550	38.2	232	1	44	285	268	307	370	556	0.45	0.45	0.39	0.515	0.485	360	35	66	65	65	62	44	8	34	18	22	29	M	17	39	BLDL	BLDL	BLDL	BLDL
APJL551	34.8	232	1	49	278	248	275	300	455	0.58	0.65	0.45	0.52	0.515	291	68	62	118	121	108	26	31	31	40	48	49	L	9	38	BLDL	BLDL	BLDL	BLDL
APJL552	34	231	1	29	287	272	303	367	534	0.615	0.58	0.58	0.52	0.55	600	81	56	115	78	84	48	41	26	39	29	43	L	17	24	0.014	-0.049	0.02	-0.142
APJL554	40	229	3	18	231	211	233	247	453	0.745	0.58	0.52	0.55	0.32	311	90	85	132	123	111	36	47	45	46	49	50	L	18	19	BLDL	BLDL	0.236	0.069
APJL555	42.8	228	2	24	283	277	300	368	536	0.68	0.78	0.52	0.68	0.515	256	69	83	72	46	55	10	32	44	22	12	24	M	11	16	BLDL	BLDL	BLDL	BLDL
APJL556	39	225	1	22	276	268	291	328	508	0.455	0.52	0.58	0.42	0.32	600	92	93	137	82	66	48	49	50	47	32	33	L	12	48	BLDL	BLDL	0.242	0.032
APJL557	37.5	224	3	2	261	246	264	315	467	0.615	0.71	0.58	0.78	0.515	362	46	24	39	38	41	45	16	6	2	8	15	F	9	6	BLDL	BLDL	BLDL	BLDL
APJL560	38	223	1	35	262	254	276	338	274	0.485	0.71	0.65	0.65	0.45	254	51	19	41	30	32	9	20	2	3	3	9	F	9	26	BLDL	BLDL	BLDL	BLDL
APJL562	35.2	222	1	13	273	257	271	332	512	0.715	0.58	0.52	0.55	0.55	328	39	79	171	33	75	41	11	42	49	5	39	M	9	9	BLDL	BLDL	BLDL	BLDL
APJL563	30.1	221	3	19	256	244	263	312	496	0.455	0.39	0.45	0.42	0.42	375	88	63	81	68	73	47	46	32	26	24	38	M	4	23	BLDL	BLDL	BLDL	BLDL
APJL565	34	218	3	27	264	253	268	280	477	0.52	0.58	0.52	0.485	0.485	289	82	86	111	34	37	25	42	46	36	6	12	L	27	40	0.022	-0.134	0.277	0.072
APJL569	31.2	215	3	21	253	243	256	282	431	0.615	0.84	0.71	0.775	0.68	285	87	90	126	44	63	23	45	48	44	11	30	L	13	5	0.012	-0.09	0.039	-0.062
APJL570	34	214	1	16	277	259	285	347	485	0.45	0.39	0.45	0.485	0.485	305	59	70	62	51	56	34	26	37	15	15	25	M	13	31	0.01	-0.082	BLDL	BLDL
APJL572	36.5	209	1	34	267	254	291	343	512	0.485	0.65	0.45	0.45	0.515	600	49	72	120	75	49	48	18	38	42	27	20	L	8	37	BLDL	BLDL	BLDL	BLDL
APJL573	34	208	3	43	270	238	251	294	468	0.615	0.65	0.58	0.585	0.71	287	71	60	112	103	68	24	33	30	37	41	34	L	12	42	BLDL	BLDL	0.037	-0.132
APJL577	42.1	202	1	1	272	263	276	346	508	0.52	0.45	0.45	0.58	0.615	245	59	34	104	66	28	5	25	12	33	23	7	F	12	50	BLDL	BLDL	BLDL	BLDL
APJL578	40.5	202	1	26	287	273	293	313	528	0.68	0.71	0.52	0.65	0.645	371	57	31	70	109	38	46	23	10	21	44	13	M	56	15	BLDL	BLDL	BLDL	BLDL
APJL582	38.4	196	2	47	268	256	282	308	491	0.68	0.71	0.58	0.68	0.55	243	80	76	151	114	30	4	40	40	48	46	8	L	13	28	BLDL	BLDL	0.409	0.252
APJL584	37	194	2	48	268	264	271	309	500	0.68	1.04	0.65	0.645	0.78	270	85	74	92	116	50	16	44	39	30	47	21	L	12	2	BLDL	BLDL	BLDL	BLDL
APJL585	40	194	1	40	234	232	259	299	488	0.485	0.52	0.58	0.775	0.645	237	58	58	65	48	24	1	24	28	19	13	5	F	10	10	BLDL	BLDL	0.033	-0.097
APJL586	38	191	3	42	199	184	206	220	384	0.485	0.45	0.39	0.42	0.355	253	91	92	173	124	103	8	48	49	50	50	48	L	11	46	0.012	-0.081	BLDL	BLDL
APJL587	36.4	190	2	25	243	226	238	255	462	0.55	0.52	0.45	0.68	0.68	302	33	35	108	55	47	32	6	13	35	17	19	F	14	14	BLDL	BLDL	BLDL	BLDL
